# Supplementary material for: New Mid-Cretaceous (Latest Albian) Dinosaurs from Winton, Queensland, Australia
Source: PLoS One. 2009 Jul 3;4(7):e6190. doi: 10.1371/journal.pone.0006190 (PMC2703565; doi:10.1371/journal.pone.0006190)
Supplement: Cladistic Matrix S1 — (0.11 MB XLS) [file pone.0006190.s001.xls]

## Sheet: Sheet1
	1	2	3	4	5	6	7	8	9	10	11	12	13	14	15	16	17	18	19	20	21	22	23	24	25	26	27	28	29	30	31	32	33	34	35	36	37	38	39	40	41	42	43	44	45	46	47	48	49
Vulcanodon	?	?	?	?	?	?	?	?	?	?	?	?	?	?	?	?	0	?	?	?	?	?	?	?	?	?	?	?	?	?	?	?	?	?	?	?	?	?	?	?	?	?	?	?	?	?	?	?	?
Barapasaurus	?	?	?	?	?	?	?	?	?	?	?	?	?	?	?	?	?	?	?	?	?	?	?	?	?	?	?	?	?	?	?	?	?	?	?	?	?	?	?	?	?	?	?	?	?	?	?	?	?
Omeisaurus	1	1	1	0	0	0	1	1	0	1	1	?	0	0	0	?	0	1	0	1	1	0	0	0	0	1	0	1	1	1	?	1	1	?	0	?	1	?	?	1	1	1	0	0	?	0	?	0	?
Shunosaurus	0	1	1	0	0	0	1	1	0	1	1	0	0	0	0	0	0	0	0	1	?	?	0	0	0	0	0	1	1	1	0	1	1	0	0	0	1	0	0	1	1	0	0	0	0	0	0	0	0
Patagosaurus	1	?	1	0	0	?	1	1	?	?	?	?	?	?	?	?	0	?	?	?	?	?	?	?	?	?	?	?	?	?	?	?	?	?	?	?	?	?	?	?	?	1	?	?	?	?	?	?	?
Mamenchisaurus	?	?	?	?	?	?	?	?	?	?	?	?	?	?	?	?	?	?	?	?	?	?	?	?	?	?	?	?	?	?	?	?	1	1	0	?	?	?	?	?	?	?	?	?	?	?	?	?	?
Apatosaurus	0	0	1	1	1	1	1	2	0	1	1	?	1	1	1	?	0	1	0	1	1	1	?	1	0	1	0	1	1	1	1	1	1	0	0	0	2	0	?	1	?	0	0	0	0	1	0	0	0
Barosaurus	?	?	?	?	?	?	?	?	?	?	?	?	?	?	?	?	?	?	?	?	?	?	?	?	?	?	?	?	?	?	?	?	?	?	?	?	?	?	?	?	?	?	?	?	?	?	?	?	?
Brachiosaurus	1	1	1	1	0	0	1	1	1	1	1	1	0	0	0	1	0	1	0	1	1	0	0	0	0	1	0	1	1	1	1	1	1	1	0	0	1	0	1	1	1	1	0	0	0	0	0	0	0
Camarasaurus	1	1	1	1	0	0	1	1	1	1	1	1	0	0	0	1	0	1	0	1	1	0	0	1	0	1	0	1	1	1	0	0	1	1	0	1	1	0	1	1	1	1	0	0	0	0	0	0	0
Dicraeosaurus	0	0	?	1	1	?	?	?	?	?	0	?	?	0	0	?	0	1	1	1	1	1	1	1	0	1	1	1	1	1	?	?	?	?	?	1	?	0	?	?	1	0	0	0	1	1	1	0	1
Diplodocus	0	0	1	1	1	1	1	2	0	1	1	1	1	1	1	1	0	1	0	1	1	1	0	1	0	1	0	1	1	1	1	1	1	0	0	0	2	0	1	1	1	0	0	0	0	1	0	0	0
Haplocanthosaurus	?	?	?	?	?	?	?	?	?	?	?	?	?	?	?	?	0	?	?	?	?	?	?	?	?	?	?	?	?	?	?	?	?	?	?	?	?	?	?	?	?	?	?	?	?	?	?	?	0
Amargasaurus	?	?	?	?	?	?	?	?	?	?	1	?	?	0	0	1	0	1	1	1	1	?	1	1	0	1	1	1	1	?	?	?	?	?	?	?	?	?	?	?	?	?	0	0	1	1	1	0	1
Euhelopus	1	1	1	0	0	?	1	1	?	?	1	?	?	?	?	1	0	?	?	?	?	?	?	?	?	?	?	?	?	?	?	1	1	0	0	?	?	0	?	1	1	1	?	?	?	?	?	?	?
Jobaria	1	1	1	1	0	0	1	1	1	1	1	1	0	0	0	1	0	1	0	1	1	0	0	0	0	1	0	1	1	1	0	1	1	1	0	?	1	0	?	1	1	?	0	0	0	?	?	0	0
Malawisaurus	1	1	?	?	?	?	?	1	?	?	1	?	?	?	?	?	?	?	?	?	?	?	?	?	?	?	?	?	?	?	?	?	?	?	?	?	?	?	?	?	?	?	?	?	?	?	?	?	?
Nigersaurus	0	0	1	1	?	?	1	1	0	0	?	?	?	0	0	1	1	?	0	0	1	?	?	?	1	?	?	?	?	1	?	1	1	1	0	?	?	?	?	?	?	?	0	0	0	1	?	0	0
Rayososaurus	?	?	?	?	?	?	?	?	?	0	1	?	?	0	0	1	1	?	0	0	1	1	0	?	1	?	?	?	1	1	0	?	1	1	0	?	?	0	?	?	?	?	1	0	0	1	0	1	0
Rebbachisaurus	?	?	?	?	?	?	?	?	?	?	?	?	?	?	?	?	?	?	?	?	?	?	?	?	?	?	?	?	?	?	?	?	?	?	?	?	?	?	?	?	?	?	?	?	?	?	?	?	?
Alamosaurus	?	?	?	?	?	?	?	?	?	?	?	?	?	?	?	?	?	?	?	?	?	?	?	?	?	?	?	?	?	?	?	?	?	?	?	?	?	?	?	?	?	?	?	?	?	?	?	?	?
Nemegtosaurus	0	1	?	1	?	0	1	1	?	1	0	1	0	0	0	1	0	1	0	1	0	1	0	1	0	1	0	1	0	1	0	1	1	1	1	2	1	1	1	1	1	?	1	1	0	0	0	1	0
Neuquensaurus	?	?	?	?	?	?	?	?	?	?	?	?	?	?	?	?	?	?	?	?	?	?	?	?	?	?	?	?	?	?	?	?	?	?	?	?	?	?	?	?	?	?	?	?	?	?	?	?	?
Opisthocoelicaudia	?	?	?	?	?	?	?	?	?	?	?	?	?	?	?	?	?	?	?	?	?	?	?	?	?	?	?	?	?	?	?	?	?	?	?	?	?	?	?	?	?	?	?	?	?	?	?	?	?
Rapetosaurus	0	0	1	1	?	1	1	1	?	1	0	?	0	0	0	?	0	0	0	1	0	1	0	1	0	1	0	1	0	1	0	?	1	1	1	2	1	1	1	?	?	?	1	1	?	0	1	0	0
Saltasaurus	?	?	?	?	?	?	?	?	?	?	?	?	?	0	0	?	?	1	0	1	?	0	0	1	0	1	?	?	?	?	?	?	?	?	?	?	?	?	?	?	?	?	0	1	0	0	0	1	0
Isisaurus	?	?	?	?	?	?	?	?	?	?	?	?	?	?	?	?	?	?	?	?	?	?	?	?	?	?	?	?	?	?	?	?	?	?	?	?	?	?	?	?	?	?	?	?	?	?	?	?	?
Tastavinsaurus	?	?	?	?	?	?	?	?	?	?	?	?	?	?	?	?	?	?	?	?	?	?	?	?	?	?	?	?	?	?	?	?	?	?	?	?	?	?	?	?	?	?	?	?	?	?	?	?	?
Venenosaurus	?	?	?	?	?	?	?	?	?	?	?	?	?	?	?	?	?	?	?	?	?	?	?	?	?	?	?	?	?	?	?	?	?	?	?	?	?	?	?	?	?	?	?	?	?	?	?	?	?
Phuwiangosaurus	?	?	?	?	?	?	?	?	?	?	?	?	?	?	?	?	?	?	?	?	?	?	?	?	?	?	?	?	?	?	?	?	?	?	?	?	?	?	?	?	?	?	?	?	?	?	?	?	?
Cedarosaurus	?	?	?	?	?	?	?	?	?	?	?	?	?	?	?	?	?	?	?	?	?	?	?	?	?	?	?	?	?	?	?	?	?	?	?	?	?	?	?	?	?	?	?	?	?	?	?	?	?
Andesaurus	?	?	?	?	?	?	?	?	?	?	?	?	?	?	?	?	?	?	?	?	?	?	?	?	?	?	?	?	?	?	?	?	?	?	?	?	?	?	?	?	?	?	?	?	?	?	?	?	?
Huanghetitan	?	?	?	?	?	?	?	?	?	?	?	?	?	?	?	?	?	?	?	?	?	?	?	?	?	?	?	?	?	?	?	?	?	?	?	?	?	?	?	?	?	?	?	?	?	?	?	?	?
Dimantinasaurus	?	?	?	?	?	?	?	?	?	?	?	?	?	?	?	?	?	?	?	?	?	?	?	?	?	?	?	?	?	?	?	?	?	?	?	?	?	?	?	?	?	?	?	?	?	?	?	?	?
Wintonotitan	?	?	?	?	?	?	?	?	?	?	?	?	?	?	?	?	?	?	?	?	?	?	?	?	?	?	?	?	?	?	?	?	?	?	?	?	?	?	?	?	?	?	?	?	?	?	?	?	?
[truncated: 197 more columns]
