# Supplementary material for: New Mid-Cretaceous (Latest Albian) Dinosaurs from Winton, Queensland, Australia
Source: PLoS One. 2009 Jul 3;4(7):e6190. doi: 10.1371/journal.pone.0006190 (PMC2703565; doi:10.1371/journal.pone.0006190)
Supplement: Cladistic Matrix S2 — (0.05 MB XLS) [file pone.0006190.s002.xls]

## Sheet: Sheet1
	1	2	3	4	5	6	7	8	9	10	11	12	13	14	15	16	17	18	19	20	21	22	23	24	25	26	27	28	29	30	31	32	33	34	35	36	37	38	39	40	41	42	43	44	45	46	47	48	49
Camarasaurus	0	0	0	0	1	0	0	0	0	0	0	0	0	0	0	0	0	0	0	0	0	0	0	0	0	0	0	0	0	0	0	0	0	0	0	0	0	0	0	0	0	0	0	0	0	0	0	0	0
Brachiosaurus	0	0	0	0	0	0	0	0	0	1	1	0	0	0	0	1	1	1	1	1	0	0	0	1	0	0	0	1	0	0	?	0	0	1	0	1	0	0	0	2	0	1	0	0	0	0	0	0	?
Euhelopus	1	1	1	?	0	?	?	?	?	?	?	?	?	?	?	?	?	?	1	1	0	0	1	2	0	0	?	1	0	?	1	?	?	1	0	1	?	0	0	3	2	0	0	1	?	0	0	1	?
Chubutisaurus	?	?	?	?	?	?	?	?	?	?	?	?	?	?	?	?	?	?	?	?	?	0	1	?	?	?	?	?	?	?	?	?	?	?	?	?	?	?	?	3	?	1	?	?	0	0	0	?	?
Phuwiangosaurus	?	?	?	?	?	?	?	?	?	?	?	?	?	?	?	?	?	?	?	?	?	0	?	?	0	1	0	0	0	0	1	0	1	0	?	0	0	?	?	?	0	0	1	1	?	0	1	0	?
Ligabuesaurus	?	?	?	?	?	?	?	?	?	?	?	?	?	?	?	?	?	?	1	1	0	0	1	?	0	0	0	1	0	1	0	0	1	0	?	1	1	0	1	1	1	1	?	1	1	0	1	?	?
Malarguesaurus	?	?	?	?	?	?	?	?	?	?	?	?	?	?	?	?	?	?	?	?	?	?	?	?	?	?	?	?	?	?	?	?	?	?	?	?	?	?	?	?	?	?	?	?	?	?	?	?	?
Andesaurus	?	?	?	?	?	?	?	?	?	?	?	?	?	?	?	?	?	?	?	?	?	0	1	?	?	?	?	?	?	?	0	?	?	?	?	1	?	0	0	2	?	1	1	1	1	0	1	?	?
Malawisaurus	0	0	1	?	?	?	?	1	?	?	1	?	?	?	0	0	?	?	2	1	0	0	1	?	1	1	0	?	0	0	0	0	0	?	?	1	?	0	1	3	1	1	?	1	1	1	1	?	?
Mendozasaurus	?	?	?	?	?	?	?	?	?	?	?	?	?	?	?	?	?	?	?	?	?	0	1	?	1	1	0	?	0	2	?	1	2	2	?	1	0	?	?	3	2	0	?	?	?	1	1	?	?
Futalognkosaurus	?	?	?	?	?	?	?	?	?	?	?	?	?	?	?	?	?	?	?	?	?	0	1	2	1	1	0	1	0	2	0	1	2	2	2	1	0	?	0	3	2	1	1	?	?	1	1	1	?
Epachthosaurus	?	?	?	?	?	?	?	?	?	?	?	?	?	?	?	?	?	?	?	?	?	0	1	?	?	?	?	?	?	?	0	?	?	?	?	1	1	1	1	3	2	?	1	1	1	0	1	1	1
Rapetosaurus	1	1	?	1	1	1	1	1	1	0	1	1	1	1	1	1	?	1	2	1	2	1	1	2	0	1	0	1	0	0	0	0	0	?	1	1	1	1	1	3	2	0	0	1	1	1	1	1	1
Lirainosaurus	?	?	?	?	?	?	?	?	?	?	?	?	?	?	?	0	?	?	2	1	?	0	1	?	?	?	?	?	?	?	0	?	?	?	?	1	?	1	0	3	?	1	1	1	1	1	1	?	?
Rinconsaurus	?	?	?	?	?	?	?	?	?	?	?	?	?	?	?	?	?	?	2	1	1	0	1	?	0	1	0	1	0	0	0	0	1	1	?	1	1	1	1	3	2	1	1	1	1	1	1	1	?
Muyellensaurus	?	?	?	?	?	1	1	?	1	0	?	1	1	1	1	1	?	?	2	1	1	0	1	?	1	1	0	?	0	0	0	0	1	1	?	1	1	1	1	3	2	1	1	1	1	1	1	1	?
Gondwanatitan	?	?	?	?	?	?	?	?	?	?	?	?	?	?	?	?	?	?	?	?	?	0	1	?	?	?	?	?	?	?	0	?	?	?	?	1	1	1	?	3	?	1	1	1	1	1	1	1	?
Aeolosaurus	?	?	?	?	?	?	?	?	?	?	?	?	?	?	?	?	?	?	2	1	2	0	?	?	?	?	?	?	?	?	?	?	?	?	?	1	?	?	?	3	?	?	1	?	?	?	?	?	?
Opisthocoelicaudia	?	?	?	?	?	?	?	?	?	?	?	?	?	?	?	?	?	?	?	?	?	0	1	?	?	?	?	?	?	?	0	?	?	?	1	0	1	1	0	3	0	1	0	1	0	1	1	1	1
Alamosaurus	?	?	?	?	?	?	?	?	?	?	?	?	?	?	?	?	?	?	2	?	2	0	1	?	0	1	0	1	0	0	0	0	0	1	?	1	?	1	1	3	?	?	1	0	0	1	1	1	?
Neuquensaurus	?	?	?	?	?	?	?	?	?	?	?	?	?	?	?	?	?	?	?	?	?	1	1	?	0	1	1	1	0	0	0	0	1	2	?	1	1	1	0	3	2	1	1	1	1	1	1	1	?
Saltasaurus	?	?	?	?	?	1	?	?	0	0	1	0	1	0	1	1	?	?	2	1	2	1	1	?	0	0	1	1	1	0	0	0	1	2	?	1	1	1	0	3	2	1	1	1	1	1	1	1	?
Rocasaurus	?	?	?	?	?	?	?	?	?	?	?	?	?	?	?	?	?	?	?	?	?	1	1	?	?	?	?	?	?	?	0	0	1	?	?	1	1	1	?	3	2	1	1	1	1	1	1	?	?
Wintonotitan	?	?	?	?	?	?	?	?	?	?	?	?	?	?	?	?	?	?	?	?	?	0	1	?	?	?	?	?	?	?	?	?	?	?	?	?	?	1	1	3	2	?	0	?	?	?	1	?	1
Dimantinasaurus	?	?	?	?	?	?	?	?	?	?	?	?	?	?	?	?	?	?	?	?	?	?	1	?	?	?	?	?	?	?	?	?	?	?	?	?	?	?	?	?	?	?	?	?	?	?	?	?	?
[truncated: 53 more columns]
