# Supplementary material for: New Mid-Cretaceous (Latest Albian) Dinosaurs from Winton, Queensland, Australia
Source: PLoS One. 2009 Jul 3;4(7):e6190. doi: 10.1371/journal.pone.0006190 (PMC2703565; doi:10.1371/journal.pone.0006190)
Supplement: Cladistic Matrix S3 — (0.03 MB XLS) [file pone.0006190.s003.xls]

## Sheet: Sheet1
	1	2	3	4	5	6	7	8	9	10	11	12	13	14	15	16	17	18	19	20	21	22	23	24	25	26	27	28	29	30	31	32	33	34	35	36	37	38	39	40	41	42	43	44	45	46	47	48	49
Herrerasaurus	0	0	0	0	0	0	0	0	0	0	0	0	0	0	0	0	0	0	1	0	0	0	0	0	0	0	0	0	0	0	0	0	0	0	0	0	0	0	0	1	0	0	0	0	0	0	0	0	0
Coelophysis	0	0	0	0	0	0	0	0	0	0	0	0	0	0	?	0	0	1	0	0	0	0	0	1	0	0	0	0	0	0	0	0	0	0	0	0	0	0	0	0	0	0	?	0	0	0	0	0	0
Torvosaurus	0	0	2	0	0	0	0	0	0	0	0	0	0	1	0	?	?	?	?	?	?	0	0	0	1	0	0	?	?	?	?	?	?	?	?	0	?	?	?	?	?	?	?	?	?	?	?	?	0
Compsognathidae	0	0	0	0	0	?	?	0	0	2	0	0	0	0	?	0	0	0	?	0	0	0	0	1	0	0	0	0	0	?	0	?	0	0	0	0	0	?	0	?	?	?	?	?	?	0	?	1	0
Acrocanthosaurus	0	0	2	1	0	1	0	0	0	?	0	0	0	?	?	0	1	0	1	1	1	1	1	1	2	1	1	1	1	1	0	0	0	1	1	1	0	1	1	0	0	0	0	0	0	0	1	1	1
Allosaurus	1	1	1	0	0	2	1	1	1	2	1	1	0	1	0	0	0	1	0	1	0	0	0	1	1	0	0	0	1	1	0	0	0	0	0	0	0	0	1	0	0	0	0	0	0	1	0	1	0
Carcharodontosaurus	1	?	?	?	1	?	?	?	0	1	0	0	1	1	1	1	1	0	0	0	1	1	1	1	2	1	1	1	?	?	1	1	1	1	1	1	1	1	0	0	1	1	1	1	1	0	?	?	1
Eocarcharia	?	?	?	?	1	1	0	0	1	?	0	0	0	1	0	?	?	?	?	?	?	1	1	1	2	1	?	?	?	?	?	0	0	1	1	1	?	?	?	?	?	?	?	?	?	?	?	?	?
Giganotosaurus	?	0	2	1	?	2	1	1	0	?	0	0	1	1	1	1	1	0	?	1	1	1	1	1	2	1	?	?	?	?	1	1	1	1	1	1	1	1	?	1	1	1	1	1	1	?	?	?	1
Mapusaurus	?	?	?	?	1	?	?	1	0	?	0	0	1	1	1	1	1	0	?	0	1	1	?	?	2	1	1	1	?	?	1	?	?	?	?	?	?	?	?	?	?	?	?	?	?	?	?	?	1
Neovenator	1	1	1	1	0	2	1	1	0	1	1	1	0	1	0	0	1	0	0	?	?	?	?	?	?	?	?	?	?	?	?	?	?	?	?	?	?	?	?	?	?	?	?	?	?	?	1	?	0
Sinraptor	1	0	0	0	0	1	0	0	1	2	0	0	0	0	0	0	0	1	1	1	1	0	0	2	2	0	1	1	0	0	0	0	0	0	0	0	1	1	1	1	0	1	0	0	1	1	1	0	0
Tyrannotitan	?	?	?	?	?	?	?	?	?	?	?	?	?	?	?	?	?	?	?	?	?	?	?	?	?	?	?	?	?	?	?	?	?	?	?	?	?	?	?	?	?	?	?	?	?	?	?	?	1
Fukuiraptor	?	?	?	?	?	?	?	?	?	?	?	?	?	1	0	?	?	?	?	?	?	?	?	?	?	?	?	?	?	?	?	?	?	?	?	?	?	?	?	?	?	?	?	?	?	?	?	?	0
Monolophosaurus	1	0	1	0	1	?	?	?	0	?	1	0	0	?	?	1	0	1	0	1	0	0	0	0	0	0	0	1	1	0	0	0	0	0	0	0	0	1	0	1	?	0	?	?	0	0	?	1	0
Australovenator	?	?	?	?	?	?	?	?	?	?	?	?	?	?	?	?	?	?	?	?	?	?	?	?	?	?	?	?	?	?	?	?	?	?	?	?	?	?	?	?	?	?	?	?	?	?	?	1	0
[truncated: 50 more columns]
